# Supplementary material for: An effective descriptor for the screening of electrolyte additives toward the stabilization of Zn metal anodes
Source: Royal Society of Chemistry journal article supplement (doi:10.1039/d4ee00199k), 2024-01-01
Supplement: d4ee00199k1.pdf [file d4ee00199k1.pdf]

# Supporting Information

## **An Effective Descriptor for the Screen of Electrolyte Additives for the Stabilization of Zn Metal Anodes**

Lin Hong<sup>a</sup>, Jingzhuo Guan<sup>a</sup>, Yiwei Tan<sup>a</sup>, Yao Chen<sup>a</sup>, Yu-Si Liu<sup>b</sup>, Wei Huang<sup>\*a</sup>, Chunyang Yu<sup>a</sup>,  
Yongfeng Zhou<sup>a</sup>, Jie-Sheng Chen<sup>a</sup>, and Kai-Xue Wang<sup>\*a</sup>

<sup>a</sup>School of Chemistry and Chemical Engineering, State Key Laboratory of Metal Matrix Composites, Shanghai Jiao Tong University, 800 Dongchuan Road, Shanghai 200240, P. R. China.

E-mail: hw66@sjtu.edu.cn (W. Huang); k.wang@sjtu.edu.cn (K. X. Wang)

<sup>b</sup>College of Smart Energy, Shanghai Jiao Tong University, 800 Dongchuan Road, Shanghai 200240, P. R. China.

### **Experimental Section**

**Preparation of Electrolyte:**  $\text{ZnSO}_4 \cdot 7\text{H}_2\text{O}$  (Macklin, 99%) was dissolved into deionized water to prepare 2.0 M  $\text{ZnSO}_4$  electrolyte. The electrolytes with different weight ratios of pectin (0.05, 0.1, 0.15, and 0.2 wt%) were prepared by adding a certain amount of pectin powder (Shanghai yuanye Bio-Technology Co., Ltd) into the  $\text{ZnSO}_4$  electrolytes and stirring for 24 h. The obtained  $\text{ZnSO}_4$ /pectin mixed electrolytes were stored in the refrigerator. The optimized weight ratio of pectin was 0.1 wt%, and the optimal electrolyte was denoted as pectin additive. The electrolyte with

other anionic polysaccharide was prepared by replacing the pectin additive by carrageenan or hyaluronic acid with a weight ratio of 0.1 wt%. The electrolyte with organic solvent (Adamas-beta) was prepared by adding DMSO, DMF, NMF, or DX into aqueous 2.0 M ZnSO<sub>4</sub> with a volume ratio of 10 vol%, respectively.

**Preparation of MnO<sub>2</sub>:** In a typical process, 2.0 mL H<sub>2</sub>SO<sub>4</sub> solution (0.5 M) was added into 90 mL MnSO<sub>4</sub> solution (3.0 mM). After continuously stirring for 10 min, 20 mL KMnO<sub>4</sub> solution (0.1 M) was added into the above solution drop by drop and stirred for 2 h. The above mixture was transferred into a Teflon-lined autoclave and maintained at 120 °C for 12 h. After cooling to room temperature, the product was collected by centrifugation, washed thoroughly with deionized water, and dried at 60 °C in a vacuum oven for 12 h.

**Materials characterizations:** The deposition morphologies were observed on confocal laser scanning microscope (CLSM, Keyence VKX3000). X-ray diffraction (XRD) patterns were characterized by a Rigaku Mini Flex 600 diffractometer using Cu K $\alpha$ -radiation ( $\lambda = 1.5418 \text{ \AA}$ ). The surface morphologies of the cycled anodes were performed on field emission scanning electron microscope (SEM, RISE-MAGNA). The *in situ* optical visualization observation of Zn plating/stripping behavior was collected by an optical microscope (LEICA DM 4000).

**Electrochemical measurements:** The Zn||Zn, Zn||Cu, and Zn||MnO<sub>2</sub> cells were assembled by CR2032-type cells and measured on a Neware battery test system (CT-4008T-5V20mA-164, Shenzhen, China) under galvanostatic charge/discharge condition. The long-term cycling stability

of Zn anode was carried out on Zn symmetrical cells with pure ZnSO<sub>4</sub> electrolyte or ZnSO<sub>4</sub>-pectin electrolyte. Coulombic efficiency (CE) measurements that reflect the reversibility of anode were performed on asymmetrical Zn||Cu cells. The Zn||MnO<sub>2</sub> full cells were assembled with Zn anode, MnO<sub>2</sub> cathode, glass fiber separators, and aqueous electrolyte. Cyclic voltammetry (CV), linear sweep voltammetry (LSV), corrosion test, and electrochemical impedance spectroscopy (EIS) were measured on an electrochemical workstation (CHI760E, China).

The depth of discharge (DOD) was calculated as follows,

$$DOD_{(\%)} = \frac{C_{actual}}{C_{theoretical}} \times 100\% = \frac{I \times t \times S}{m \times C_{theoretical}} \times 100\%$$

Where  $C_{actual}$  (mAh g<sup>-1</sup>) is actual specific capacity of deposited/stripped Zn,  $C_{theoretical}$  (mAh g<sup>-1</sup>) is theoretical specific capacity of Zn anode (~820 mAh g<sup>-1</sup>),  $I$  (mA cm<sup>-2</sup>) is the current density during plating/stripping process,  $t$  (h) is the deposited/stripped time of Zn,  $S$  (cm<sup>2</sup>) and  $m$  (g) are actual area and mass of electrode, respectively.

**Computational Method:** Density functional theory (DFT) calculations were carried out using projector-augmented wave (PAW) method as implemented in Vienna ab initio simulation package (VASP). A generalized gradient approximation (GGA) of Perdew-Burke-Ernzerhof (PBE) functional was employed to describe the exchange-correlation interaction. An energy cutoff of 450 eV and Gamma centered 2×2×1 k-points mesh were applied to all calculations. The structures were relaxed until the forces and total energy on all atoms were converged to less than -0.05 eV Å<sup>-1</sup> and 1 × 10<sup>-5</sup> eV, respectively. To evaluate the interaction between Zn matrix and pectin, the binding energy ( $E_b$ ) was calculated as follows,

$$E_b = E_{Total} - E_{Zn} - E_{pectin}$$

where  $E_{pectin}$  is the energy of pectin compound.  $E_{Total}$  is the total energy of pectin compound adsorbed on Zn matrix.  $E_{Zn}$  is the energy of Zn matrix. The lower the binding energy, the stronger the interaction between Zn matrix and pectin. The dissociation energy barriers of H<sub>2</sub>O on the surface are calculated using the climbing-image nudged elastic band (CI-NEB) method.

To evaluate the desolvation process, the binding energy between H<sub>2</sub>O and pectin was calculated as follows,

$$E_b = E_{Total} - E_{H2O} - E_{pectin}$$

where  $E_{pectin}$  and  $E_{Total}$  are the total energy of compound before and after H<sub>2</sub>O adsorption, respectively.  $E_{H2O}$  is the energy of a single H<sub>2</sub>O molecule. The electrostatic potential (ESP) analyses and HOMO-LUMO analyses are based on the B3LYP/6-31G (d, p) of Gaussian 09w software package.

**Electric field simulation:** In order to simulate the dynamic evolution of Zn deposition on electrodes in different electrolytes, a Finite Element Analysis (FEA) model was performed using COMSOL Multiphysics 6.1 software with the “Phase Field” module. The size of the entire two-dimensional model for order parameter distribution analysis was set to 6.0×6.0 μm. A transient simulation of the process was carried out in an area filled with electrolyte.

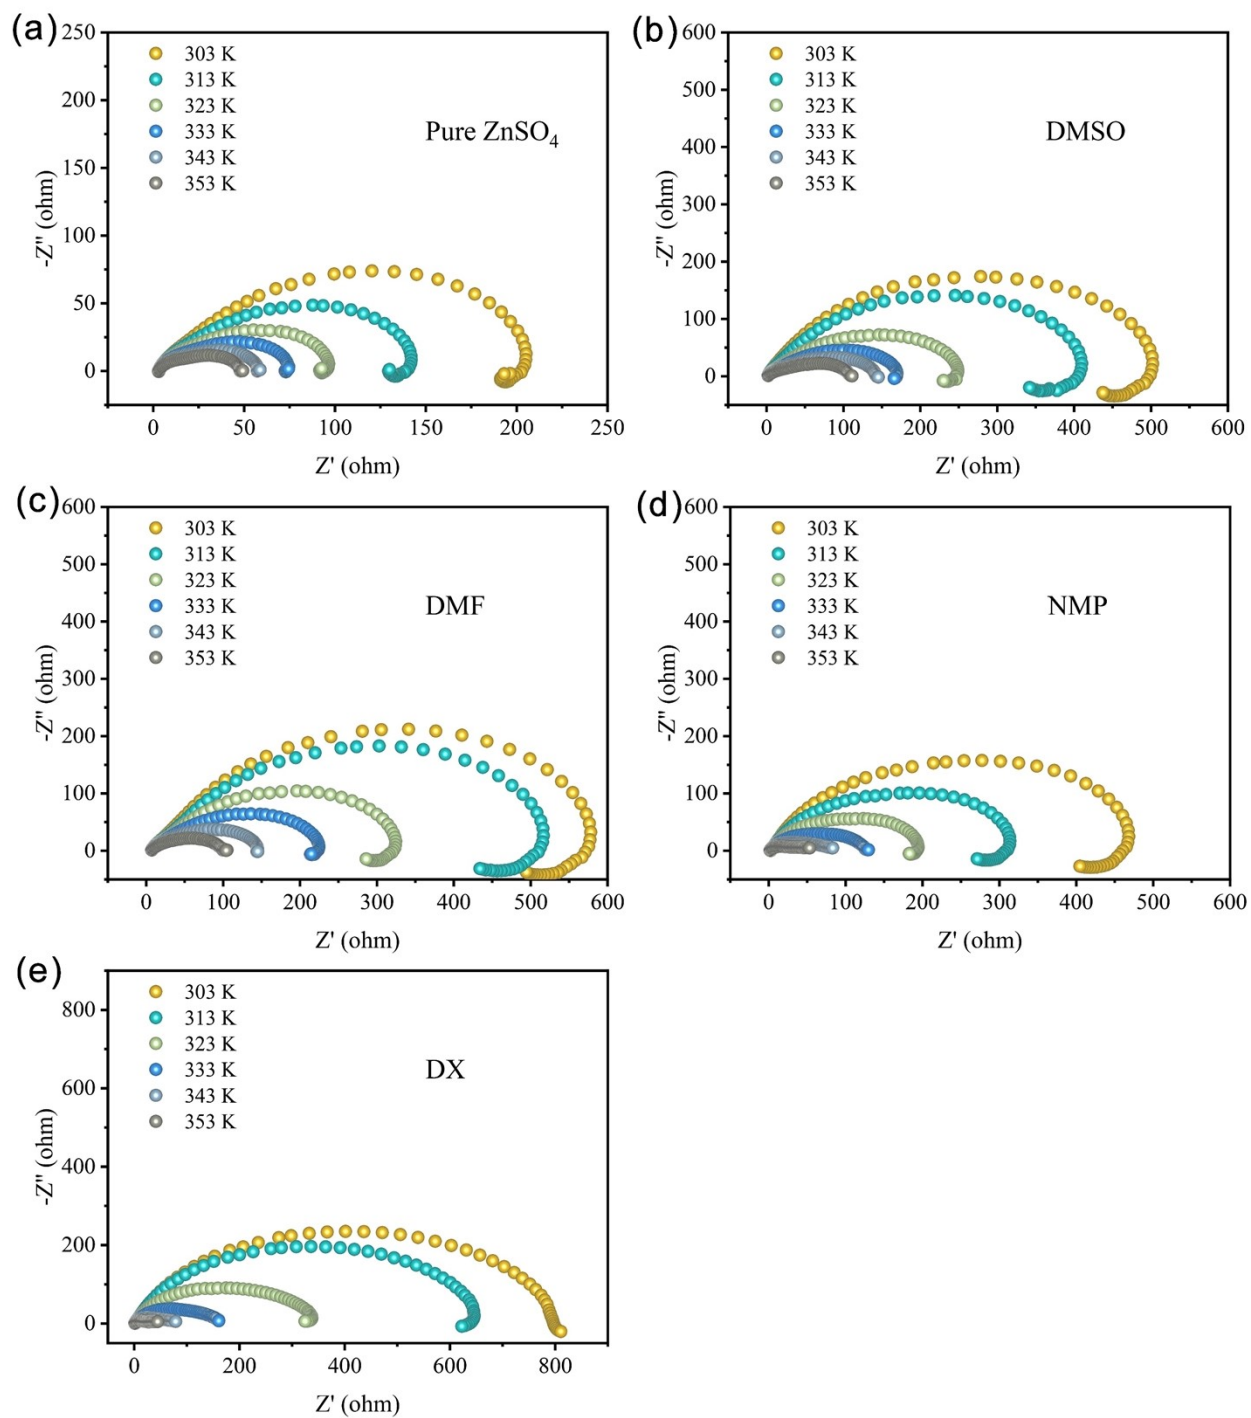

**Figure S1** Nyquist plots of symmetric cells with (a) pure  $ZnSO_4$ , (b) DMSO, (c) DMF, (d) NMP, and (e) DX additive at different temperatures.

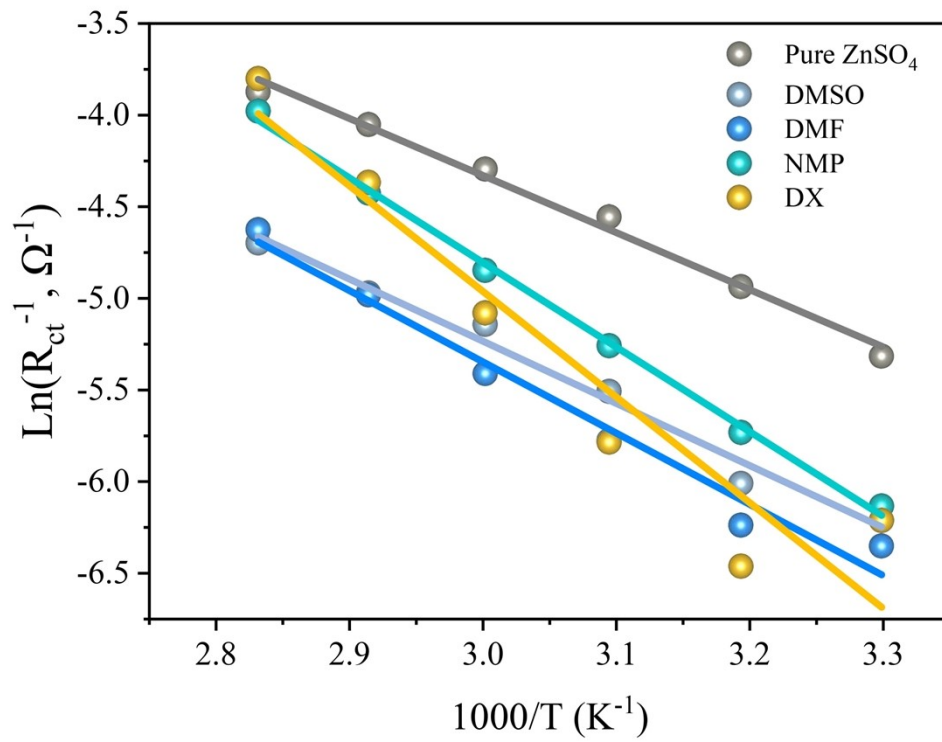

**Figure S2** Fitting Arrhenius curves of symmetric cells with different organic solvents additives obtained from the Nyquist plots at different temperatures.

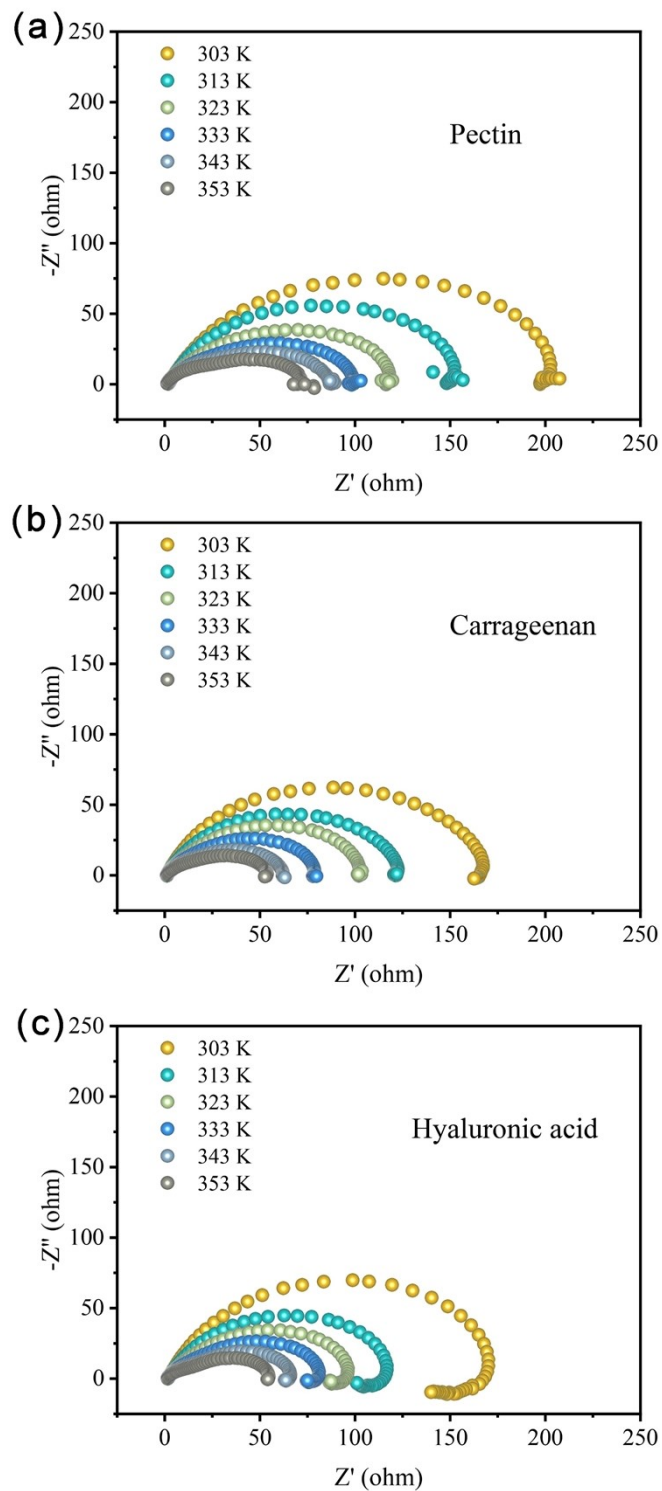

**Figure S3** Nyquist plots of symmetric cells with (a) pectin, (b) carrageenan, and (c) hyaluronic acid additive at different temperatures.

**Table S1 Summary of the desolvation activation energies of the symmetric cells with different electrolyte additives.**

| Additive               | Desolvation activation energy (kJ mol <sup>-1</sup> ) |
|------------------------|-------------------------------------------------------|
| <b>Pectin</b>          | <b>17.5</b>                                           |
| Hyaluronic acid        | 19.2                                                  |
| Carrageenan            | 20.2                                                  |
| Pure ZnSO <sub>4</sub> | 25.9                                                  |
| DMSO                   | 28.2                                                  |
| DMF                    | 32.3                                                  |
| NMP                    | 38.4                                                  |
| DX                     | 47.9                                                  |



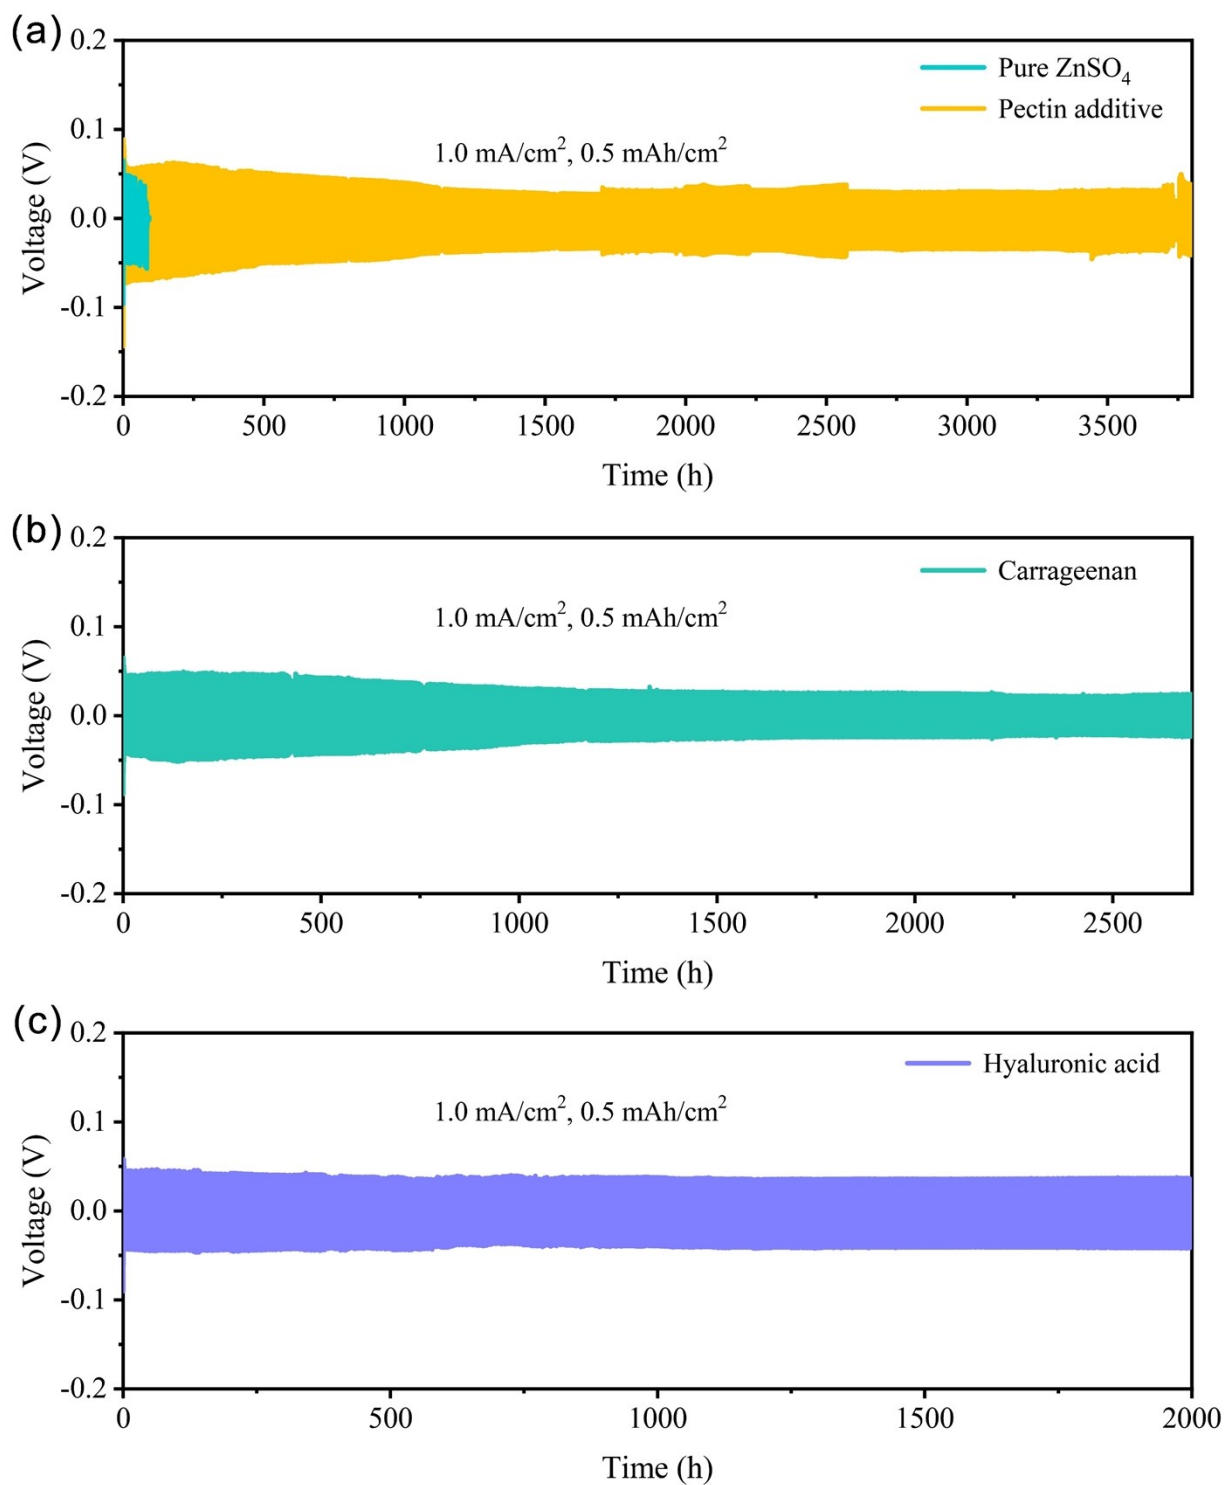

**Figure S4** Cycling performance of Zn-Zn symmetric cells with (a) pectin, (b) carrageenan, and (c) hyaluronic acid additive at 1.0 mA cm<sup>-2</sup> for 0.5 mAh cm<sup>-2</sup>.

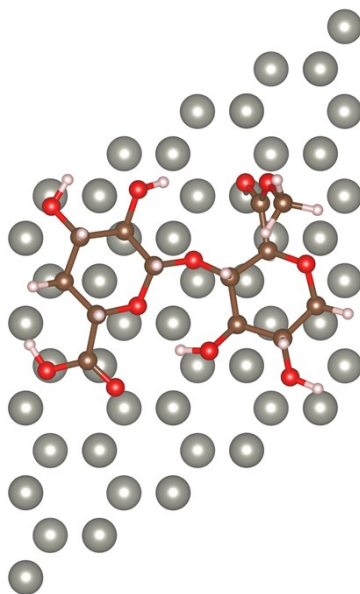

**Figure S5** The top view of the adsorption configuration of the parallelly placed pectin adsorbed on Zn slab.

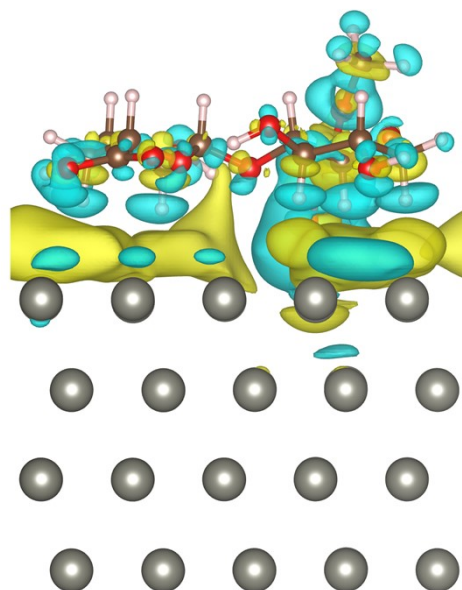

**Figure S6** Charge density difference map of adsorption configuration of the parallelly placed pectin adsorbed on Zn slab.

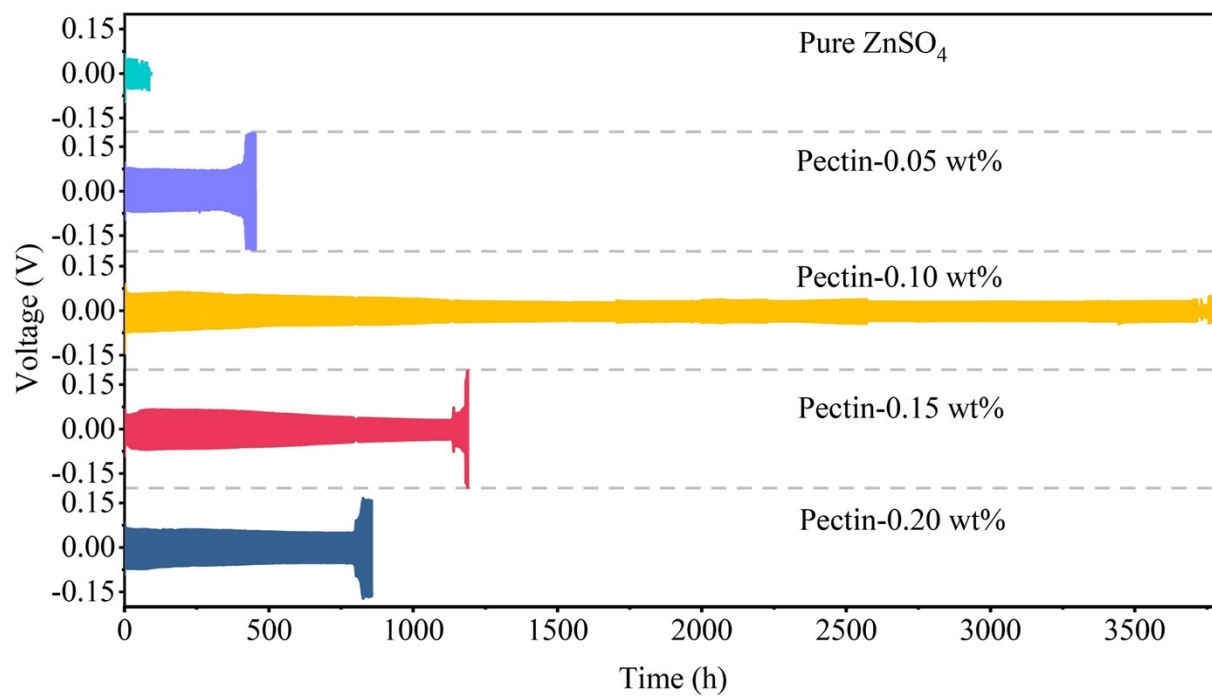

**Figure S7** Cycling performance of Zn-Zn symmetric cells in different electrolytes at  $1.0 \text{ mA cm}^{-2}$  for  $0.5 \text{ mAh cm}^{-2}$ .

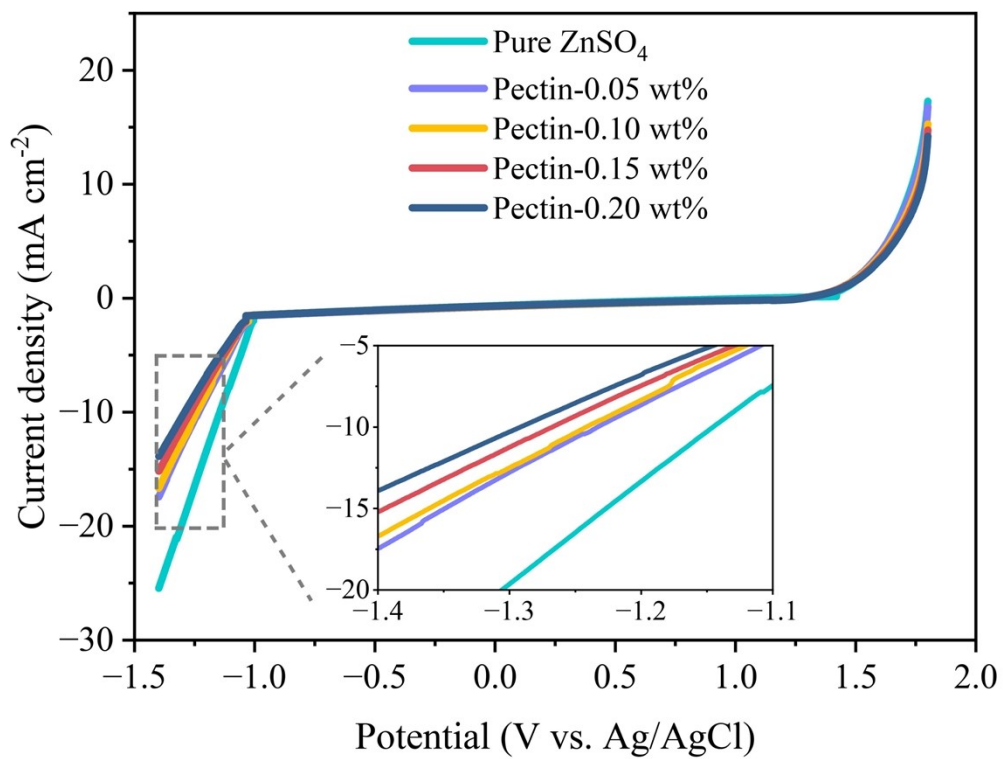

**Figure S8** Electrochemical windows of the electrolytes with different pectin concentrations.

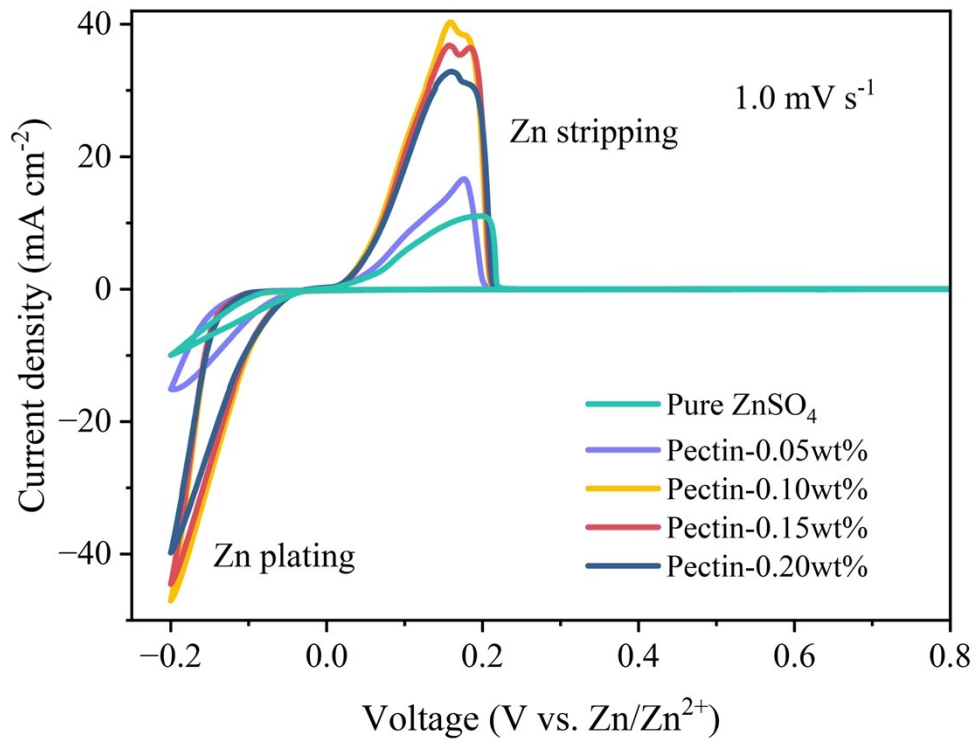

**Figure S9** Cyclic voltammograms of Zn plating/stripping in ZnSO<sub>4</sub>-based electrolytes with different pectin concentrations.

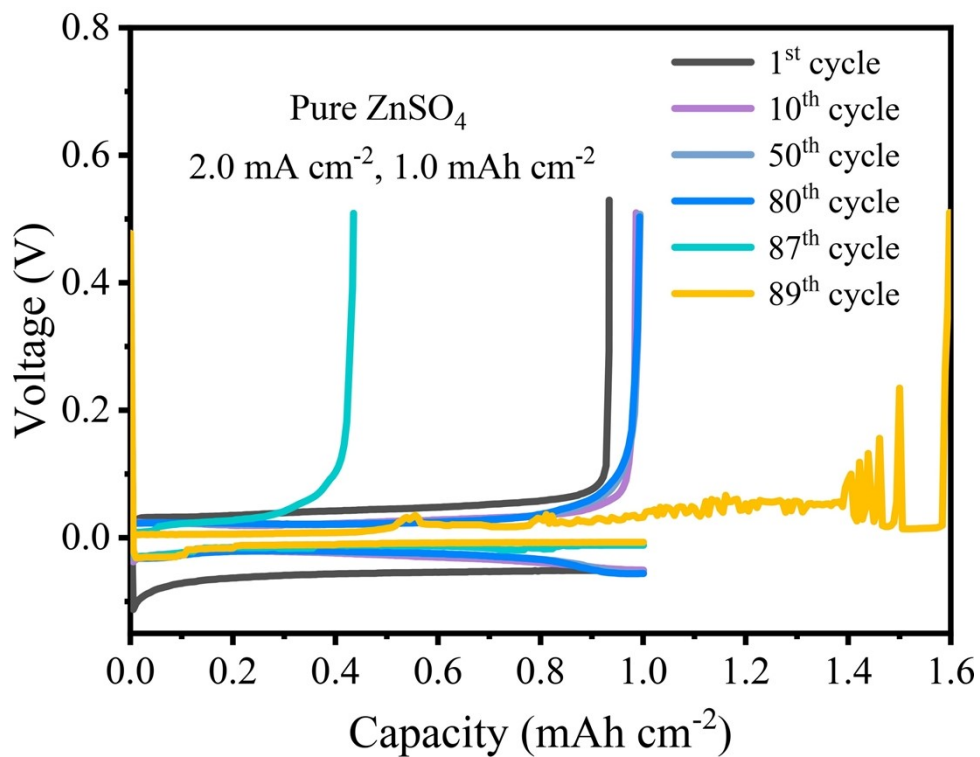

**Figure S10** Voltage profiles of the Cu||Zn cells with pure ZnSO<sub>4</sub> electrolyte at 2.0 mA cm<sup>-2</sup> with 1.0 mAh cm<sup>-2</sup>.

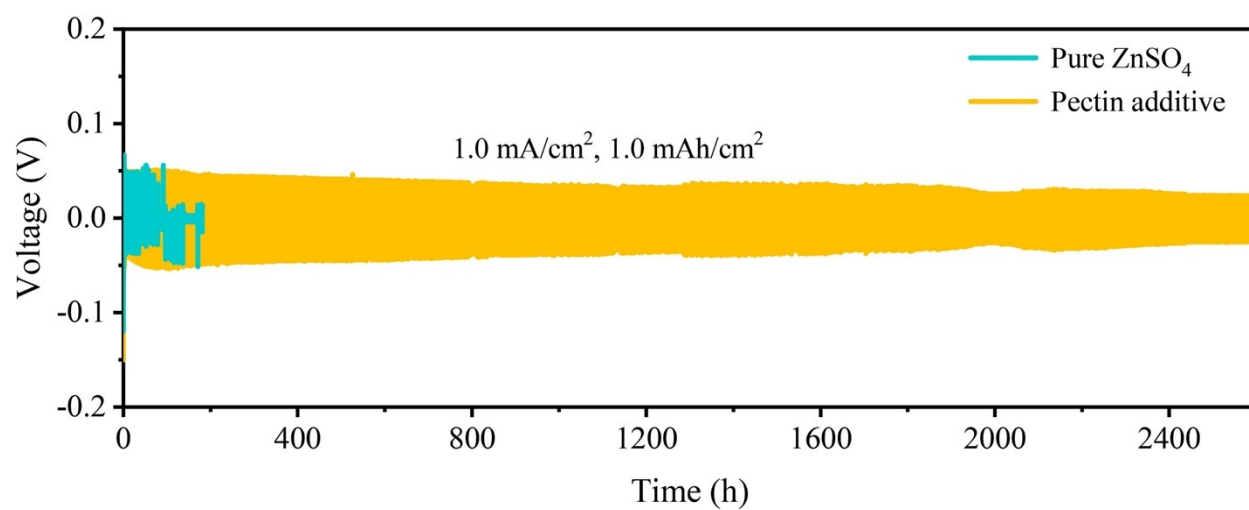

**Figure S11** Cycling performance of Zn-Zn symmetric cells at 1.0 mA cm<sup>-2</sup> for 1.0 mAh cm<sup>-2</sup>.



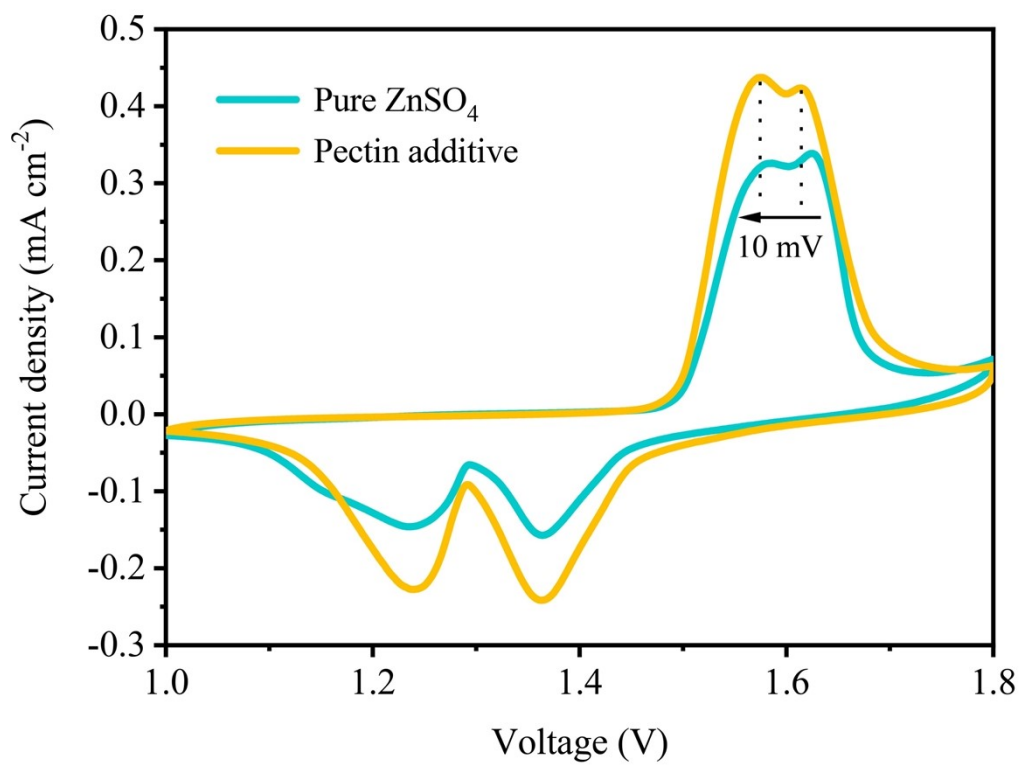

**Figure S12** CV curves of the Zn||MnO<sub>2</sub> full cells with/without pectin additive at 0.08 mV s<sup>-1</sup>.

**Table S2 Summary of the performance of the symmetric cells and full cells.**

| Additive      | Symmetric cell performance |                        |             | Cathode                       | Full cell performance |                       |              | Ref.             |
|---------------|----------------------------|------------------------|-------------|-------------------------------|-----------------------|-----------------------|--------------|------------------|
|               | Current density            | Capacity               | Life        |                               | Current density       | Capacity <sup>a</sup> | Cycle number |                  |
|               | (mA/cm <sup>2</sup> )      | (mAh/cm <sup>2</sup> ) | (h)         |                               |                       | (mAh/g)               |              |                  |
| <b>Pectin</b> | <b>5</b>                   | <b>5</b>               | <b>900</b>  | <b>MnO<sub>2</sub></b>        | <b>2 C</b>            | <b>175</b>            | <b>500</b>   | <b>This work</b> |
|               | <b>2</b>                   | <b>2</b>               | <b>2200</b> |                               |                       |                       |              |                  |
|               | <b>1</b>                   | <b>1</b>               | <b>2600</b> |                               |                       |                       |              |                  |
|               | <b>1</b>                   | <b>0.5</b>             | <b>3700</b> |                               |                       |                       |              |                  |
| Glucose       | 1                          | 1                      | 2000        | MnO <sub>2</sub>              | 3.08 A/g<br>(10C)     | ~112                  | 1000         | [1]              |
| Cyclodextrin  | 5                          | 5                      | 200         | V <sub>2</sub> O <sub>5</sub> | 1 A/g                 | ~170                  | 200          | [2]              |
| Vanillin      | 1                          | 1                      | 1000        | V <sub>2</sub> O <sub>5</sub> | 3 A/g                 | 249.7                 | 500          | [3]              |
| DMAc          | 0.5                        | 1                      | ~700        | MnO <sub>2</sub>              | 0.5 A/g               | 188                   | 880          | [4]              |
| ACN           | 0.5                        | 0.5                    | 700         | PTPAn                         | 1 A/g                 | ~90                   | 6000         | [5]              |
| Cysteine      | 5                          | 2                      | 350         | MnO <sub>2</sub>              | 0.6 A/g               | 96.1%<br>retention    | 300          | [6]              |
| Glycerol      | 2                          | 2                      | 650         | V <sub>2</sub> O <sub>5</sub> | 2 A/g                 | 161.2                 | 1300         | [7]              |
| SMD           | 1                          | 1                      | 1400        | MnO <sub>2</sub>              | 1 A/g                 | ~60                   | 1300         | [8]              |
| 6-AA          | 1                          | 1                      | 900         | MnO <sub>2</sub>              | 0.5 A/g               | ~100                  | 200          | [9]              |
| Sucrose       | 0.5                        | 0.5                    | 3300        | MnO <sub>2</sub>              | 1 A/g                 | ~170                  | 800          | [10]             |

<sup>a</sup>Capacity: 1 C = 308 mA/g

## References

- [1] Sun, P.; Ma, L.; Zhou, W.; Qiu, M.; Wang, Z.; Chao, D.; Mai, W., Simultaneous Regulation on Solvation Shell and Electrode Interface for Dendrite - Free Zn Ion Batteries Achieved by a Low - Cost Glucose Additive. *Angew. Chem., Int. Ed.* **2021**, 60 (33), 18247-18255.
- [2] Zhao, K.; Fan, G.; Liu, J.; Liu, F.; Li, J.; Zhou, X.; Ni, Y.; Yu, M.; Zhang, Y.-M.; Su, H.; Liu, Q.; Cheng, F., Boosting the Kinetics and Stability of Zn Anodes in Aqueous Electrolytes with Supramolecular Cyclodextrin Additives. *J. Am. Chem. Soc.* **2022**, 144 (25), 11129-11137.
- [3] Zhao, K.; Liu, F.; Fan, G.; Liu, J.; Yu, M.; Yan, Z.; Zhang, N.; Cheng, F., Stabilizing Zinc Electrodes with a Vanillin Additive in Mild Aqueous Electrolytes. *ACS Appl. Mater. Interfaces* **2021**, 13 (40), 47650-47658.
- [4] Wu, F.; Chen, Y.; Chen, Y.; Yin, R.; Feng, Y.; Zheng, D.; Xu, X.; Shi, W.; Liu, W.; Cao, X., Achieving Highly Reversible Zinc Anodes via N, N - Dimethylacetamide Enabled Zn - Ion Solvation Regulation. *Small* **2022**, 18 (27), 2202363.
- [5] Zhang, Z.; He, Z.; Wang, N.; Wang, F.; Du, C.; Ruan, J.; Li, Q.; Sun, D.; Fang, F.; Wang, F., Regulating the Water Molecular in the Solvation Structure for Stable Zinc Metal Batteries. *Adv. Funct. Mater.* **2023**, 33 (27), 2214648.
- [6] Jiang, P.; Du, Q.; Shi, M.; Yang, W.; Liang, X., Stabilizing Zinc Anodes by a Uniform Nucleation Process with Cysteine Additive. *Small Methods* **2023**, 2300823.
- [7] Yang, S.; Xue, K.; Zhang, J.; Guo, Y.; Wu, G.; Li, C.; Xia, C.; Zhang, Y.; Chen, Y.; Zhou, L., Synergistic electrostatic shielding manipulation of Na<sup>+</sup> and desolvation effect of Zn<sup>2+</sup> enabled by glycerol for long-lifespan and dendrite-free Zn anodes. *Energy Storage Mater.* **2023**, 62, 102929.
- [8] Zheng, S.; Wang, Y.; Luo, B.; Sun, L.; Duan, G.; Huang, J.; Ye, Z., In-situ formation of heterogeneous interfaces inducing surface crystallographic manipulation toward highly stable Zn anode. *Chem. Eng. J.* **2023**, 473, 145313.
- [9] Huh, S.-H.; Choi, Y. J.; Kim, S. H.; Bae, J.-S.; Lee, S.-H.; Yu, S.-H., Enabling the uniform zinc deposition by zwitterion additive in aqueous zinc metal anode. *J. Mater. Chem. A* **2023**, 11

(36), 19384-19395.

[10]Zhou, L.; Yang, R.; Xu, S.; Lei, X.; Zheng, Y.; Wen, J.; Zhang, F.; Tang, Y., Maximizing Electrostatic Polarity of Non-Sacrificial Electrolyte Additives Enables Stable Zinc-Metal Anodes for Aqueous Batteries. *Angew. Chem., Int. Ed.* **2023**, 62, e202307880
